# Supplementary material
Source: PubMed Central journal article supplement (PMC2778746)
Supplement: supp_136_23_4033__1.pdf [file supp_136_23_4033__1.pdf]

**Table S1. Perimeters of the pronephric duct**

| Ductal region                     | Outer perimeter ( $\mu\text{m}$ ) |                     |          |                        |                     |          |
|-----------------------------------|-----------------------------------|---------------------|----------|------------------------|---------------------|----------|
|                                   | 2 dpf                             |                     |          | 4 dpf                  |                     |          |
|                                   | Wild type ( <i>n</i> )            | Mutant ( <i>n</i> ) | <i>P</i> | Wild type ( <i>n</i> ) | Mutant ( <i>n</i> ) | <i>P</i> |
| Anterior                          | 48.7 $\pm$ 1.7 (5)                | 49.9 $\pm$ 3.4 (4)  | 0.52     | 63.6 $\pm$ 7.1 (8)     | 94.4 $\pm$ 5.4 (3)  | <0.001   |
| Medial                            | 45.9 $\pm$ 3.2 (8)                | 50.3 $\pm$ 5.8 (7)  | 0.09     | 32.3 $\pm$ 2.2 (6)     | 68.5 $\pm$ 20.8 (7) | <0.01    |
| Posterior                         | 47.6 $\pm$ 5.5 (6)                | 53.4 $\pm$ 5.0 (9)  | 0.05     | 32.7 $\pm$ 2.2 (4)     | 73.7 $\pm$ 9.8 (10) | <0.0001  |
| Inner perimeter ( $\mu\text{m}$ ) |                                   |                     |          |                        |                     |          |
| Anterior                          | 8.6 $\pm$ 2.0                     | 15.0 $\pm$ 2.4      | <0.01    | 17.3 $\pm$ 3.5         | 47.6 $\pm$ 5.0      | <0.0001  |
| Medial                            | 11.8 $\pm$ 2.1                    | 21.8 $\pm$ 4.0      | <0.0001  | 9.8 $\pm$ 0.4          | 29.1 $\pm$ 11.1     | <0.01    |
| Posterior                         | 9.9 $\pm$ 1.2                     | 24.1 $\pm$ 5.8      | <0.0001  | 8.0 $\pm$ 2.1          | 30.6 $\pm$ 9.2      | <0.001   |

*n*, number of ducts analyzed.
