# Supplementary material
Source: PubMed Central journal article supplement (PMC2778746)
Supplement: supp_136_23_4033__2.pdf [file supp_136_23_4033__2.pdf]

**Table S2. Nuclei number in cross sections of the pronephric duct**

| 2 dpf     | Wild type | <i>n</i> | <i>sco</i> | <i>n</i> | <i>P</i> -value           |
|-----------|-----------|----------|------------|----------|---------------------------|
| Anterior  | 4.11±0.49 | 6        | 4.75±0.53  | 4        | 0.004446663               |
| Medial    | 3.6±0.52  | 6        | 5.67±0.66  | 6        | 3.43171×10 <sup>-12</sup> |
| Posterior | 2.83±0.82 | 6        | 3.56±0.24  | 4        | 0.014070426               |
| 4 dpf     | Wild type | <i>n</i> | <i>sco</i> | <i>n</i> | <i>P</i> -value           |
| Anterior  | 5.17±0.53 | 4        | 6.54±0.25  | 4        | 1.18874×10 <sup>-5</sup>  |
| Medial    | 2.94±0.07 | 4        | 9.92±1.94  | 5        | 1.39969×10 <sup>-24</sup> |
| Posterior | 2.80±0.18 | 4        | 6.00±1.55  | 6        | 3.58094×10 <sup>-14</sup> |

*n*, number of ducts analyzed.
